# Supplementary material for: Improved efficiency of solution-processed bulk-heterojunction organic solar cells and planar-heterojunction perovskite solar cells with efficient hole-extracting Si nanocrystals
Source: Royal Society of Chemistry journal article supplement (doi:10.1039/c6ra24205g), 2016-01-01
Supplement: c6ra24205g1.pdf [file c6ra24205g1.pdf]

Supplementary information for

**Improved Efficiency of Solution-Processed Bulk-Heterojunction Organic Solar Cells and Planar-Heterojunction Perovskite Solar with Efficient Hole-Extracting Si Nanocrystals**

*Hanbin Jeong<sup>†</sup>, Hansol Kim<sup>†</sup>, Won-Il Song<sup>‡</sup>, Kyung-Hoon Yoo<sup>‡</sup>, Jason Rama<sup>‡</sup>, and Jae Kwan Lee<sup>†,\*</sup>*

<sup>†</sup> Department of Chemistry Education/Carbon Materials, Chosun University, Gwangju, 561-756, Republic of Korea.

<sup>‡</sup> Department Advanced Convergent Technology R&D, Korean Institute of Industrial Technology, Gyunggi, 426-910, Korea.

<sup>‡</sup> Meliorum Technologies, Inc., Rochester, New York, 14607, USA

\*Fax: +82-62-232-8122; Tel: +82-62-230-7319; E-mail: [chemedujk@chosun.ac.kr](mailto:chemedujk@chosun.ac.kr)

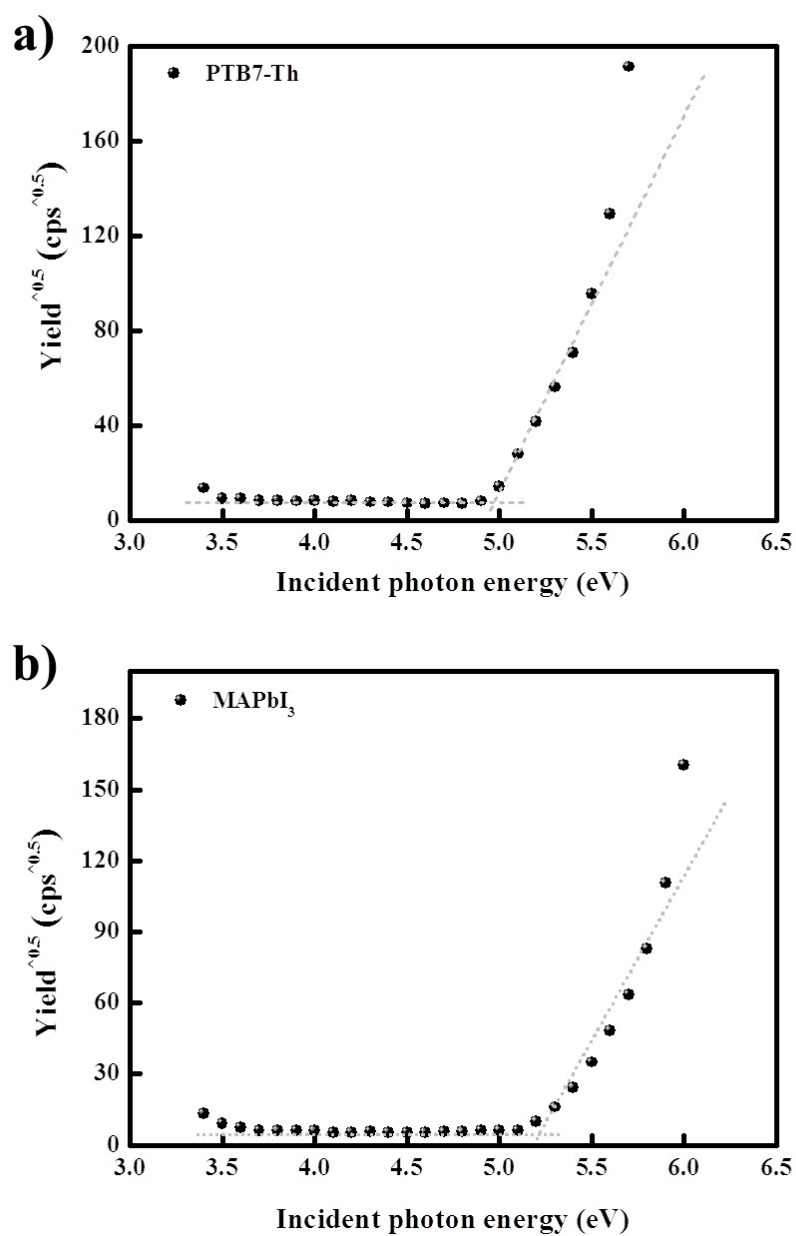

**Figure S1.** The UPS spectra of (a) PTB7-Th and (b) MAPbI<sub>3</sub> materials, which were estimated from the ionization potentials.

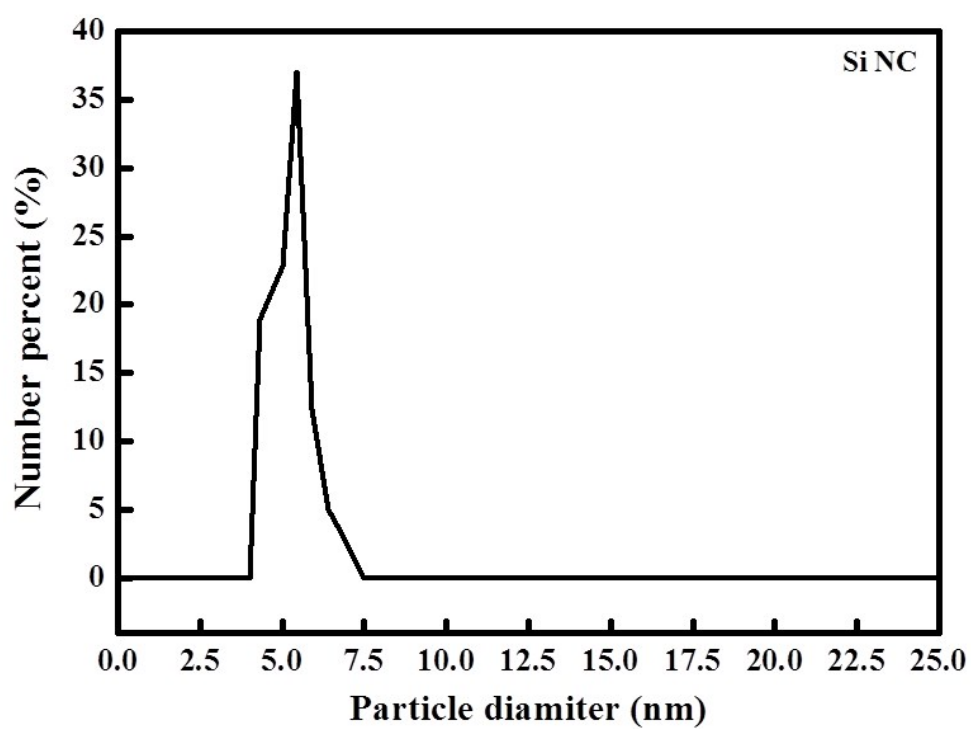

**Figure S2.** DLS spectra of Si NCs prepared using a modified electrochemical etching method.

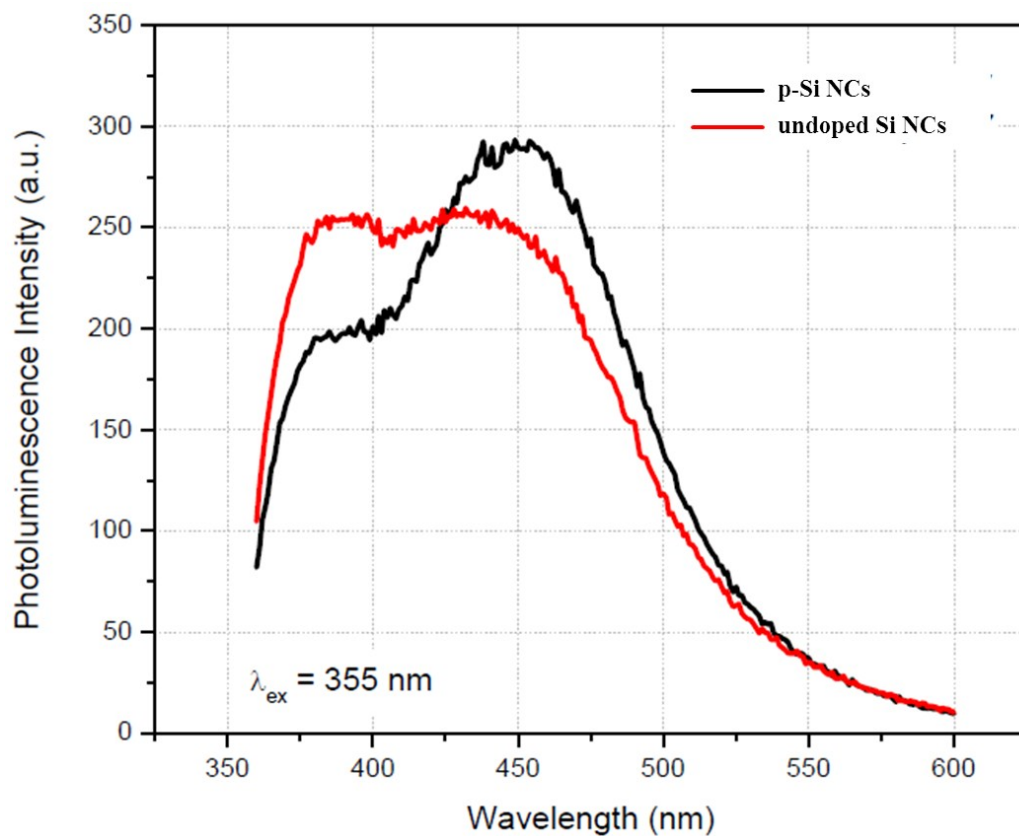

**Figure S3.** Photoluminescence spectra of p-Si NCs and undoped Si NCs, which were obtained from B-doped and undoped polycrystalline silicon wafers, respectively, by a modified electrochemical etching approach.

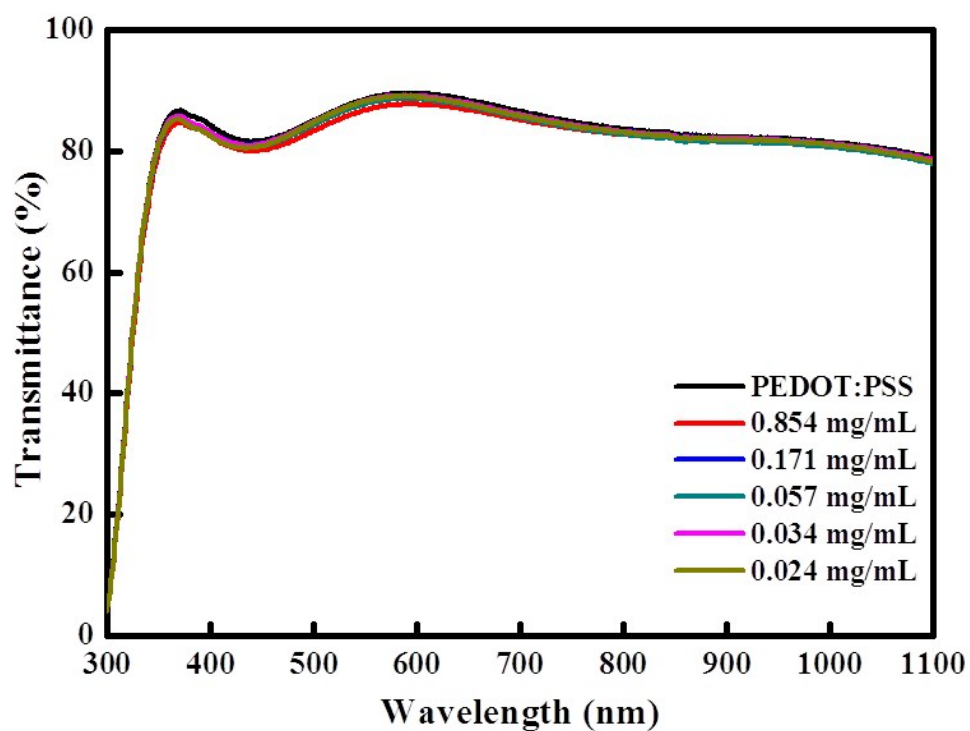

**Figure S4.** Transmittance spectra of Si NCs spin-cast on the ITO/PEDOT:PSS substrates for various Si NCs concentrations (0.024, 0.034, 0.057, 0.171, and 0.854 mg/ml) in CB.

**Table S1.** Photovoltaic performances of these BHJ OSC (black) and PHJ PrSC (red) devices with PEDOT:PSS/p-Si NC HEM layers fabricated at various concentrations (0, 0.024, 0.034, 0.057, 0.171, and 0.854 mg/ml) of Si NCs in CB solvent.<sup>a</sup>

| Devices                                             | p-Si NC<br>(mg/mL) | $J_{sc}$ ave/max<br>(mA/cm <sup>2</sup> ) | $V_{oc}$ ave/max<br>(V) | $F\cdot F$ ave/max | $\eta$ ave/max<br>(%) |
|-----------------------------------------------------|--------------------|-------------------------------------------|-------------------------|--------------------|-----------------------|
| PTB7-<br>Th:PC <sub>71</sub> BM BHJ<br>OSC          | 0                  | 16.46/16.62                               | 0.81/0.82               | 0.61/0.62          | 8.21/8.35             |
|                                                     | 0.024              | 16.89/17.16                               | 0.79/0.80               | 0.65/0.66          | 8.21/8.95             |
|                                                     | 0.034              | 17.16/17.78                               | 0.79/0.80               | 0.64/0.66          | 8.70/9.25             |
|                                                     | 0.057              | 16.90/17.21                               | 0.80/0.80               | 0.64/0.66          | 8.65/8.96             |
|                                                     | 0.171              | 16.34/17.04                               | 0.79/0.80               | 0.63/0.66          | 8.14/8.54             |
|                                                     | 0.854              | 14.20/15.72                               | 0.78/0.80               | 0.63/0.66          | 7.00/7.92             |
| MAPbI <sub>3</sub> /PC <sub>61</sub> BM<br>PHJ PrSC | 0                  | 15.23/15.69                               | 0.73/0.74               | 0.76/0.77          | 8.47/8.59             |
|                                                     | 0.024              | 17.96/18.29                               | 0.74/0.74               | 0.77/0.78          | 10.25/10.53           |
|                                                     | 0.034              | 18.00/18.22                               | 0.74/0.75               | 0.77/0.78          | 10.33/10.52           |
|                                                     | 0.057              | 17.62/18.29                               | 0.75/0.77               | 0.76/0.77          | 8.76/9.04             |
|                                                     | 0.171              | 16.24/16.92                               | 0.70/0.72               | 0.75/0.77          | 8.49/9.16             |
|                                                     | 0.854              | 16.27/16.86                               | 0.51/0.57               | 0.63/0.70          | 5.27/6.61             |

<sup>a</sup>) The performances are determined under simulated 100 mW·cm<sup>-2</sup> AM 1.5 illumination. The light intensity using calibrated standard silicon solar cells with a proactive window made from KG5 filter glass traced to the NREL. The active area of device is 4.5 mm<sup>2</sup>.
